# Supplementary material for: Preclinical Evaluation of Fatty Acid Synthase and EGFR Inhibition in Triple-Negative Breast Cancer
Source: Oxford University Press journal article supplement (doi:10.1158/1078-0432.ccr-15-3133), 2016-04-22
Supplement: 10780432ccr153133-sup-160110_1_supp_3409758_848s8p.docx [file 10780432ccr153133-sup-160110_1_supp_3409758_848s8p.docx]

**Supplementary Table S1**. TNBC Patients demographics and clinical characteristics (n=26).

|  |  |  |  |
| --- | --- | --- | --- |
|  | **Median Age** | 54 |  |
|  | **Type of surgery:** |  |  |
|  | Lumpectomy | 43,5% |  |
|  | Mastectomy | 49,4% |  |
|  | No surgery | 7,1% |  |
|  | **Histology:** |  |  |
|  | Ductal carcinoma | 85,0% |  |
|  | Lobulillar carcinoma | 6,3% |  |
|  | Others | 6,2% |  |
|  | Unknown | 2,5% |  |
|  | **Mean Ki 67** | 64,5% |  |
|  | **Grade III** | 85,2% |  |
|  | **Stage:** |  |  |
|  | I | 21,7% |  |
|  | II | 41,0% |  |
|  | III | 31,4% |  |
|  | IV | 3,6% |  |
|  | Unknown | 2,4% |  |
|  | **Chemotheraphy:** |  |  |
|  | Antraciclines+ others | 12,9% |  |
|  | Taxanes only | 1,6% |  |
|  | Taxanes +others | 9,6% |  |
|  | Antraciclines + Taxanes | 50,0% |  |
|  | Platins | 0,0% |  |
|  | Others (CMF, Capecitabine) | 25,8% |  |
|  |  |  |  |
